# Supplementary material for: Development of a Method for Scaffold-Free Elastic Cartilage Creation
Source: PubMed Central journal article supplement (PMC7698291; doi:10.3390/ijms21228496), 2020-11-11

**A**

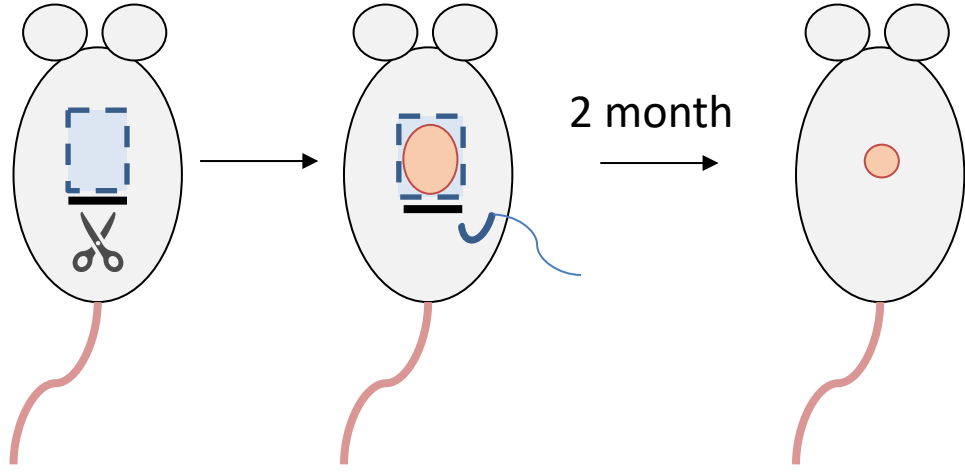

— Cut line  
- - - Transplantation Area

Cut and make space    Transplantation    Harvest

**B**

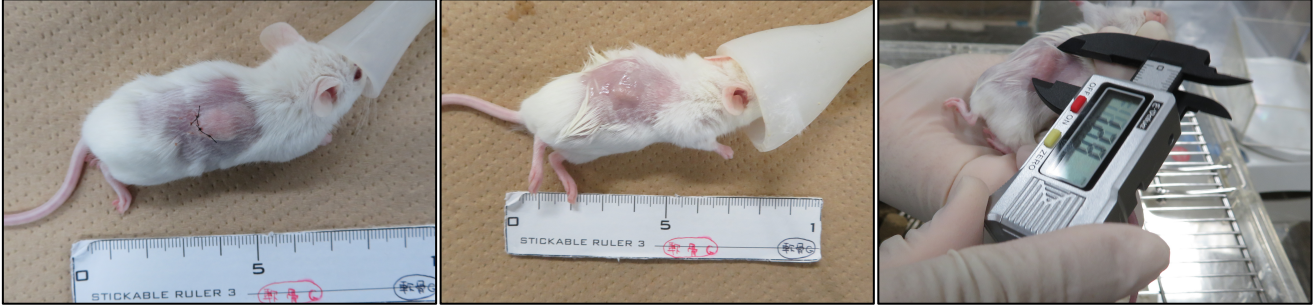

Transplanted day 0    Transplanted day 60    Measurement length

## Sham

HE

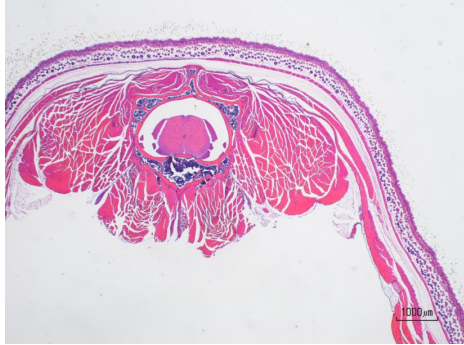

AB

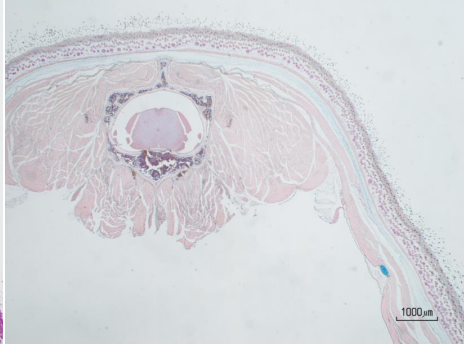

## Transplantation

HE

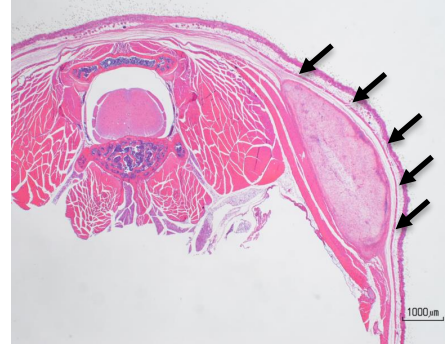

AB

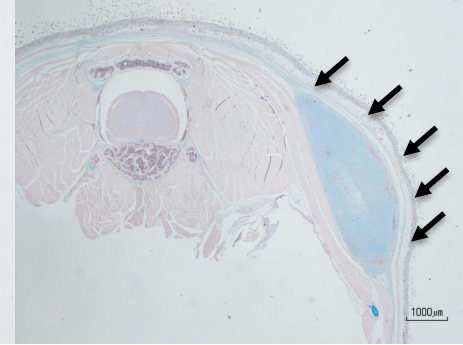

Supplement: ijms-21-08496-s001.pdf [file ijms-21-08496-s001.pdf]
